# Supplementary material
Source: HighWire-hosted journal article supplement (https://bmjopen.bmj.com/content/8/1/e018416)
Supplement: inline-supplementary-material-3 [file inline-supplementary-material-3.pdf]

**Supplementary Table 3: Mean cigarettes per day (CPD) and poly-substance use data at monthly follow-ups collected at the same time point (Intention-To-Treat Analysis)**

| Follow-up month            | Mean CPD (Range)  | Crack (%) | Marijuana (%) | Heroin (%) | Fentanyl (%) | OxyContin (%) | Other drug (%) |
|----------------------------|-------------------|-----------|---------------|------------|--------------|---------------|----------------|
| Baseline                   | 20.5<br>(0.66-50) | -         | -             | -          | -            | -             | -              |
| Month 1 follow up:<br>N=65 | *11.9<br>(0-32)   | Yes: 35   | Yes: 47.5     | Yes: 7.5   | Yes: 3.8     | Yes: 5        | Yes: 13.8      |
| Month 2 follow up:<br>N=56 | 9.9<br>(1-35)     | Yes: 31.2 | Yes: 45       | Yes: 7.5   | Yes: 2.5     | Yes: 3.8      | Yes: 11.3      |
| Month 3 follow up:<br>N=52 | 9.0<br>(0-27)     | Yes: 40   | Yes: 37.5     | Yes: 0     | Yes: 1.2     | Yes: 0        | Yes: 10        |
| Month 4 follow up:<br>N=46 | 10.1<br>(1-25)    | Yes: 27.5 | Yes: 32.5     | Yes: 1.2   | Yes: 1.2     | Yes: 2.5      | Yes: 10        |
| Month 5 follow up:<br>N=42 | 9.3<br>(0.5-30)   | Yes: 30   | Yes: 30       | Yes: 7.5   | Yes: 3.7     | Yes: 1.2      | Yes: 1.2       |
| Month 6 follow up:<br>N=34 | *9.3<br>(0.6-25)  | Yes: 31.3 | Yes: 26.2     | Yes: 1.2   | Yes: 1.2     | Yes: 1.2      | Yes: 2.5       |

\*Paired t-test, p=0.0001
