# Supplementary material
Source: HighWire-hosted journal article supplement (https://bmjopen.bmj.com/content/8/1/e018416)

**Supplementary Figure 1: Frequency of participants reporting each dimension of the EQ-5D-3L at the baseline**

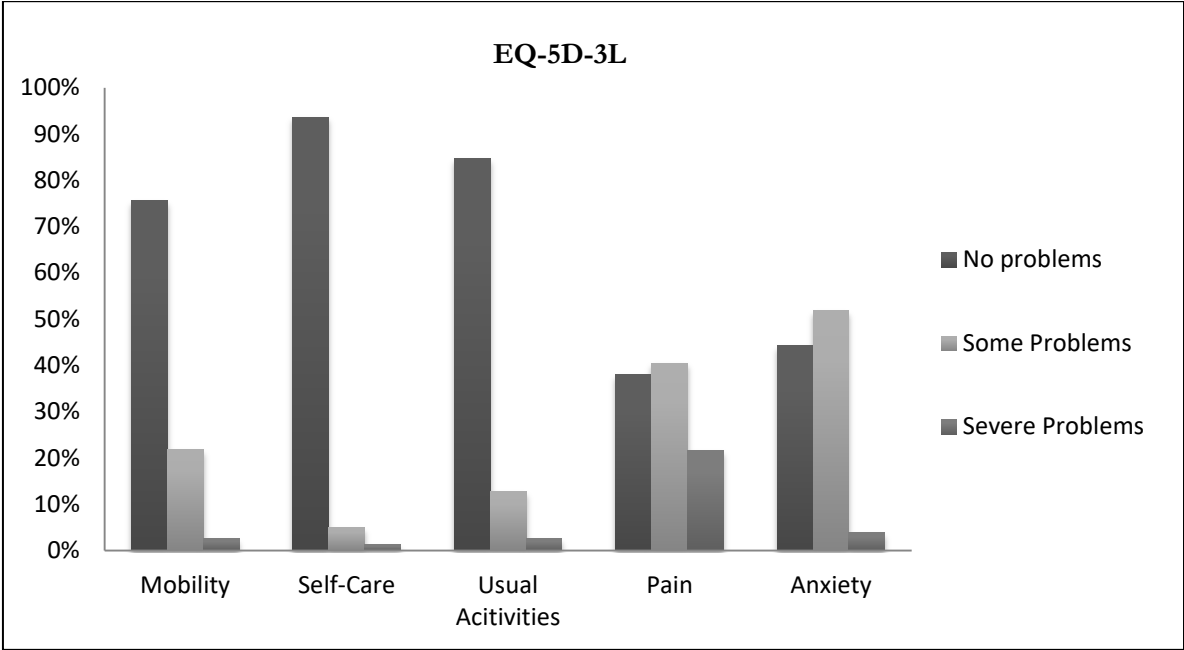

Supplement: inline-supplementary-material-4 [file inline-supplementary-material-4.pdf]
