# Supplementary material
Source: HighWire-hosted journal article supplement (https://bmjopen.bmj.com/content/8/1/e018416)

**Supplementary Figure 2: Mean cigarettes per day and exhaled CO per month of six month study duration.**

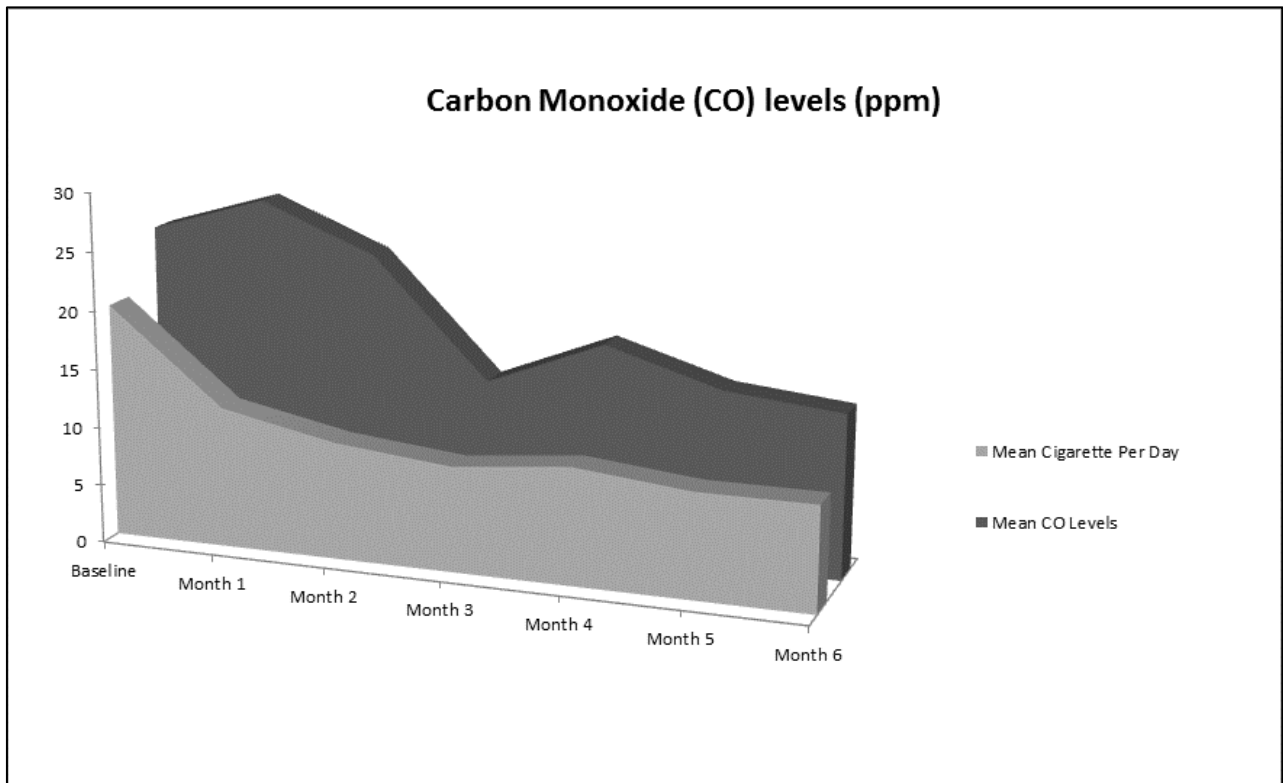

Supplement: inline-supplementary-material-5 [file inline-supplementary-material-5.pdf]
